# Supplementary material
Source: publisher site journal article supplement (https://www.dovepress.com/article/277268)
Supplement: Supplementary file 1 [file get_supplementary_file.php]

**SUPPLEMENTARY MATERIAL**

***CHDH-PNPLA3* gene-gene interactions predict insulin resistance in children with obesity**

**Supplementary text**

**Quantification of plasma choline and betaine**

**Standards and reagents**

**Choline, betaine, choline chloride-(trimethyl-d9) and Betaine-(trimethyl-d9)** hydrochloride were purchased from Sigma-Aldich (St. Louis, MO, USA). Formic acid and ammonium formate were purchased from Merck (Darmstadt, Germany), acetonitrile was purchased from AppliChem GmbH (Darmstadt, Germany), and water from VWR International (Radnor, Pennsylvania, USA). All reagents were HPLC-grade.

**Methodology**

Choline and betaine were measured from plasma by liquid chromatography-tandem mass spectrometry (LC-MS/MS) using an existing method (1) with adaptations for the laboratory specifics.

**Sample preparation**

Aliquots of 10 µL plasma were transferred into test tubes and mixed with 400 µL acetonitrile containing internal standards (choline-d9 and betaine d-9, each to a final concentration of 100 ng/mL). The mixtures were kept at -20°C for 5 minutes and then centrifuged at 13,000 g for 5 min. The supernatant was transferred into autosampler vials.

**LC-MS/MS analysis**

Analysis was performed using a Shimadzu UHPLC Nexera X2 LC system coupled to a LCMS-8045 triple quadrupole mass spectrometer (Shimadzu Corporation, Kyoto, Japan) operated with an electrospray ionization (ESI) source in positive mode. The MS/MS parameters (table 1) were optimised by injection of 1 μL aliquots with concentrations of 1 μg/mL. The chromatographic separation was achieved using an ACQUITY UPLC BEH HILIC 50 × 2.1 mm, 1.7 μm particle size, and 130Å pore diameter (Waters, Milford, Massachusetts, USA) column. The mobile phases consisted of ’A’ - 15 mM ammonium formate pH 3.5 and ’B’ - acetonitrile. The elution profile started at 90% B then decreased to 70% over 0.1 min, it was maintained at this level for 2.5 min and then returned to 90% B over 0.1 min and maintained at this level for another 3.8 min – for a total run time of 6.5 min. LC Total pump flow was set to 0.4 mL/min, while autosampler and column thermostat temperature were set to 5°C and 30°C respectively. Sample injection volume was set to 2 μL. Other instrument parameters were: interface temperature - 300 °C, desolvation line - 250 °C, heat block temperatures - 400 °C, interface voltage - 3kV, nebulizing gas (nitrogen) flow - 3 L/min, drying and heating gas (nitrogen) flow - 10 L/min, collision gas (argon) pressure - 230 kPa.

MS data were processed using LabSolution software (v5.91/2017, Shimadzu Corporation, Kyoto, Japan). i-PeakFinder method was used for peak integration. Peak identification was based on absolute retention time (RT) with a window of 2%. Reference ion ratio allowance was set to 30%. The quantitation method was based on 5-point calibration: 6.25, 12.5, 25, 50 and 100 μg/mL for choline and 12.5, 25, 50, 100 and 200 μg/mL for betaine.

**Table S1.** **LC-MS/MS optimized transitions**

|  | Transitions (*m/z*) |
| --- | --- |
| Choline | 104.10>60.15  104.10>58.15 |
| Choline-d9 | 113.25>69.20  113.25>66.20 |
| Betaine | 118.30>58.10  118.30>59.15 |
| Betaine-d9 | 127.15>66.20 |
| 127.15>68.20 |

Legend: m/z – mass to charge ratio

**Table S2. Number of children in each age group**

|  | | GENDER | | |
| --- | --- | --- | --- | --- |
| Boys | Girls | Total |
| Count | Count | Count |
| Age | 7 | 4 | 4 | 8 |
| 8 | 12 | 7 | 19 |
| 9 | 6 | 8 | 14 |
| 10 | 7 | 8 | 15 |
| 11 | 11 | 7 | 18 |
| 12 | 7 | 8 | 15 |
| 13 | 10 | 8 | 18 |
| 14 | 4 | 5 | 9 |
| 15 | 4 | 5 | 9 |
| 16 | 5 | 9 | 14 |
| 17 | 9 | 3 | 12 |
| 18 | 1 | 1 | 2 |

**Table S3.** The frequencies of 52 single nucleotide polymorphisms studied within 153 subjects.

| **Gene** | **Rs Chr Position GRCh37** | **AA/AB/BB** | **AA%** | **AB%** | **BB%** |
| --- | --- | --- | --- | --- | --- |
| *ABCB4* | rs1149222 chr7:87073775 | GG/GT/TT | 2.0 | 25.5 | 72.5 |
| rs2071645 chr7:87105276 | GG/GC/CC | 74.0 | 24.7 | 1.3 |
| rs31672 chr7:87059699 | CC/CT/TT | 2.0 | 30.7 | 67.3 |
| rs4148811 chr7:87101486 | TT/TG/GG | 74.5 | 23.5 | 2.0 |
| rs9655950 chr7:87033561 | CC/CT/TT | 0.7 | 28.8 | 70.6 |
| rs1202283 chr7:87082292 | GG/GA/AA | 14.4 | 50.3 | 35.3 |
| *APOC3* | rs2854117 chr11:116700142 | TT/TC/CC | 9.2 | 44.4 | 46.4 |
| *CHDH* | rs12676 chr3:53857803 | AA/AC/CC | 11.1 | 41.8 | 47.1 |
| rs2289209 chr3:53852835 | CC/CT/TT | 88.9 | 11.1 | 0 |
| rs4563403 chr3:53850814 | CC/CT/TT | 79.1 | 20.9 | 0 |
| rs4687591 chr3:53864407 | AA/AG/GG | 86.8 | 11.8 | 1.3 |
| rs6807783 chr3:53859662 | GG/GC/CC | 64.1 | 33.3 | 2.6 |
| rs7634578 chr3:53876728 | CC/CT/TT | 98.7 | 1.3 | 0 |
| rs881883 chr3:53847805 | AA/AG/GG | 69.5 | 27.8 | 2.6 |
| *CHKB* | rs1557502 chr22:51013998 | CC/CT/TT | 60.1 | 35.3 | 4.6 |
| rs1557503 chr22:51013072 | GG/GA/AA | 88.2 | 11.8 | 0 |
| rs470117 chr22:51009953 | CC/CT/TT | 33.6 | 46.6 | 19.9 |
| rs7238 chr22:51007488 | AA/AG/GG | 80.0 | 20.0 | 0 |
| *FADS2* | rs2526678chr1161623793 | GG/GA/AA | 85.0 | 15.0 | 0 |
| rs526126chr1161624885 | GG/GC/CC | 2.0 | 30.1 | 68.0 |
| *MTHFD1* | rs10135928 chr14:64866439 | TT/TC/CC | 94.1 | 5.9 | 0 |
| *MTHFR* | rs1801133 chr1:11856378 | GG/GA/AA | 41.8 | 45.1 | 13.1 |
| rs2066471 chr1:11860458 | CC/CT/TT | 67.3 | 30.1 | 2.6 |
| rs4846048 chr1:11846252 | GG/GA/AA | 9.8 | 41.8 | 48.4 |
| rs4846052 chr1:11857951 | TT/TC/CC | 16.3 | 48.4 | 35.3 |
| *SCD* | rs11557927 chr10:102121816 | TT/TG/GG | 89.5 | 9.8 | 0.7 |
| rs11599710 chr10:102105788 | GG/GA/AA | 89.5 | 9.8 | 0.7 |
| rs12247426 chr10:102115327 | CC/CG/GG | 98.7 | 1.3 | 0 |
| rs2167444 chr10:102124744 | TT/TA/AA | 75.2 | 21.6 | 3.3 |
| rs7849 chr10:102122603 | TT/TC/CC | 70.4 | 25.0 | 4.6 |
| *SLC44A1* | rs10120572chr9108077756 | TT/TG/GG | 98.7 | 1.3 | 0 |
| rs10820799 chr9:108092216 | AA/AC/CC | 92.2 | 7.8 | 0 |
| rs193008 chr9:108042806 | TT/TC/CC | 83.6 | 16.4 | 0 |
| rs328006 chr9:108039808 | GG/GC/CC | 83.7 | 16.3 | 0 |
| rs440290 chr9:107987290 | TT/TC/CC | 84.3 | 15.7 | 0 |
| rs443094 chr9:108016685 | GG/GC/CC | 84.3 | 15.7 | 0 |
| rs7018875 chr9:108077434 | CC/CA/AA | 96.1 | 3.9 | 0 |
| *STAT3* | rs9891119 chr17:40507980 | AA/AC/CC | 44.4 | 40.5 | 15.0 |
| *PCYT1A* | rs1580820 chr3:195966258 | GG/GA/AA | 0.7 | 22.2 | 77.1 |
| rs4898190 chrX:24607933 | AA/AC/CC | 0.7 | 4.6 | 94.7 |
| *PEMT* | rs1109859chr1717424333 | GG/GA/AA | 7.2 | 34.2 | 58.6 |
| rs16961845 chr17:17432456 | CC/CT/TT | 84.3 | 15.7 |  |
| rs4244593 chr17:17420218 | TT/TG/GG | 21.1 | 48.7 | 30.3 |
| rs4479310 chr17:17405504 | CC/CT/TT | 11.8 | 48.4 | 39.9 |
| rs7214988 chr17:17491836 | CC/CG/GG | 84.2 | 15.8 | 0 |
| rs7946 chr17:17409560 | CC/CT/TT | 12.6 | 48.3 | 39.1 |
| rs8068641chr1717480187 | AA/AG/GG | 78.4 | 21.6 | 0 |
| rs936108 chr17:17439793 | CC/CT/TT | 27.5 | 49.7 | 22.9 |
| rs13342397 chr17:17460926 | TT/TC/CC | 83.7 | 16.3 | 0 |
| rs6502603 chr17:17445680 | GG/GT/TT | 26.8 | 49.7 | 23.5 |
| *PNPLA3* | rs2281135 chr22:44332570 | GG/GA/AA | 58.2 | 39.9 | 2.0 |
| rs738409 chr22:44324727 | CC/CG/GG | 51.6 | 19.0 | 29.4 |

Legend: For each SNP, the name of the nearest gene is provided. Gene name as per international nomenclature HUGO Gene Nomenclature Committee (HGNC); Chr—chromosome position reference genome GRCh37; AA—homozygous for one allele; AB—heterozygous; BB—homozygous for the other allele; *ABCB4*—ATP binding cassette subfamily B member 4; *APOC3*—apolipoprotein C3; *CHDH*—choline dehydrogenase; *CHKB*—choline/ethanolamine kinase beta; *FADS2*—fatty acid desaturase 2; *MTHFD1*—methylenetetrahydrofolate dehydrogenase; *MTHFR*—methylenetetrahydrofolate reductase; *SCD*—stearoyl-CoA desaturase; *SLC44A1*—solute carrier family 44 member 1; *STAT3*—signal transducer and activator of transcription 3; *PCYT1A*—phosphate cytidylyltransferase 1, choline, alpha; *PCYT1B*—phosphate cytidylyltransferase 1, choline, beta; *PEMT*—phosphatidylethanolamine N-methyltransferase; *PNPLA3*—patatin-like phospholipase domain containing 3.

**Reference**

**1. Kirsch SH, Herrmann W, Rabagny Y, Obeid R. Quantification of acetylcholine, choline, betaine, and dimethylglycine in human plasma and urine using stable-isotope dilution ultra performance liquid chromatography-tandem mass spectrometry. J Chromatogr B Anal Technol Biomed Life Sci. 2010;**
